# Supplementary material for: Preparation and photocatalytic activity of eccentric Au–titania core–shell nanoparticles by block copolymer templates
Source: Royal Society of Chemistry journal article supplement (doi:10.1039/c0cp01353f), 2010-12-15
Supplement: c0cp01353f.pdf [file c0cp01353f.pdf]

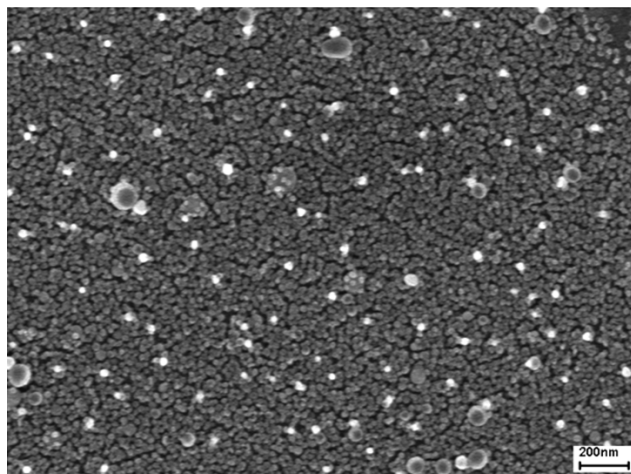

**Fig S1.** FESEM image of a hybrid film prepared from  $\text{HAuCl}_4$  loaded block copolymer solution/ titania sol-gel precursor after removing the copolymer matrix. It is clearly seen that Au particles (lighter parts) form on the surface of titania.
